# Supplementary material for: Calcium influx through TRP channels induced by short-lived reactive species in plasma-irradiated solution
Source: PubMed Central journal article supplement (PMC4864414; doi:10.1038/srep25728), 2016-05-12
Supplement: srep25728-s2.pdf [file srep25728-s2.pdf]

# **Calcium influx through TRP channels induced by short-lived reactive species in plasma-irradiated solution**

Shota Sasaki<sup>1,\*</sup>, Makoto Kanzaki<sup>2</sup>, and Toshiro Kaneko<sup>1</sup>

<sup>1</sup>*Department of Electronic Engineering, Tohoku University,  
6-6-05 Aoba, Aramaki, Aoba-ku, Sendai 980-8579, Japan*

<sup>2</sup>*Department of Biomedical Engineering, Tohoku University,  
6-6-04 Aoba, Aramaki, Aoba-ku, Sendai 980-8579, Japan*

\* *e-mail address: sasaki12@ecei.tohoku.ac.jp*

## Supplementary Movie

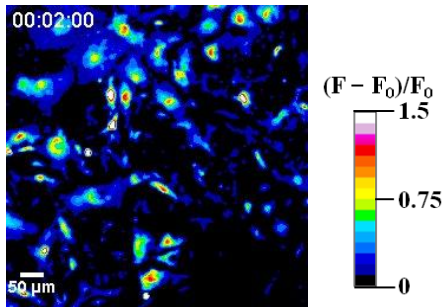

**Supplementary Movie 1.** Time-lapse movie showing changes in  $[Ca^{2+}]_i$  in 3T3-L1 cells stimulated with plasma-irradiated HBS ( $t_i = 10$  s). (The plasma- plasma-irradiated solution was injected at 0 s)
